# Supplementary material
Source: PubMed Central journal article supplement (PMC5915193)
Supplement: EHP1353.s001.acco.pdf [file EHP1353.s001.acco.pdf]

**Note to readers with disabilities:** *EHP* strives to ensure that all journal content is accessible to all readers. However, some figures and Supplemental Material published in *EHP* articles may not conform to [508 standards](#) due to the complexity of the information being presented. If you need assistance accessing journal content, please contact [ehp508@niehs.nih.gov](mailto:ehp508@niehs.nih.gov). Our staff will work with you to assess and meet your accessibility needs within 3 working days.

### **Supplemental Material**

#### **Residential Air Pollution and Associations with Wheeze and Shortness of Breath in Adults: A Combined Analysis of Cross-Sectional Data from Two Large European Cohorts**

Dany Doiron, Kees de Hoogh, Nicole Probst-Hensch, Stéphane Mbatchou, Marloes Eeftens, Yutong Cai, Christian Schindler, Isabel Fortier, Susan Hodgson, Amadou Gaye, Ronald Stolk, and Anna Hansell

#### **Table of Contents**

**Table S1:** Netherlands/Belgium area LUR model used for the Lifelines Cohort Study

**Table S2:** Southeast England area (London/Oxford) LUR model used for UK Biobank study

**Table S3:** Questionnaire assessment items used by Lifelines and UK Biobank

**Table S4:** Harmonized variables used in analyses

**Table S5:** Prevalence of wheeze and shortness of breath according to smoking status and passive smoking exposure

**Table S6:** Logistic regression model estimates of associations between annual average air pollution exposures at the baseline residence and respiratory symptoms for pooled models 1, 2 and 3

**Table S7:** Sensitivity analyses: restricting pooled analyses to those living at the same address for more than 5 years and more than 10 years

**Figure S1:** Adjusted odds ratios (and 95% CI) for respiratory symptoms in association with a 5- $\mu\text{g}/\text{m}^3$  increase in ambient  $\text{PM}_{10}$  at participant residences among population subgroups based on pooled data from the Lifelines and UK Biobank cohorts

**Figure S2:** Adjusted odds ratios (and 95% CI) for respiratory symptoms in association with a 10- $\mu\text{g}/\text{m}^3$  increase in ambient  $\text{NO}_2$  at participant residences among population subgroups based on pooled data from the Lifelines and UK Biobank cohorts

**Table S1:** Netherlands/Belgium area LUR model used for the Lifelines Cohort Study <sup>†</sup>

| Pollutant | Predictor variables in final model <sup>1</sup>                                                                                                                                                                                                                                                                                                                                                                                                                                                                                                                                                                                                                                                                                                                                                                                                                                                                                | Final LUR model                                                                                                                                                                                                                                                                                                                                                                     | R <sup>2</sup> of model | R <sup>2</sup> cross validation |
|-----------|--------------------------------------------------------------------------------------------------------------------------------------------------------------------------------------------------------------------------------------------------------------------------------------------------------------------------------------------------------------------------------------------------------------------------------------------------------------------------------------------------------------------------------------------------------------------------------------------------------------------------------------------------------------------------------------------------------------------------------------------------------------------------------------------------------------------------------------------------------------------------------------------------------------------------------|-------------------------------------------------------------------------------------------------------------------------------------------------------------------------------------------------------------------------------------------------------------------------------------------------------------------------------------------------------------------------------------|-------------------------|---------------------------------|
| PM2.5     | <ul style="list-style-type: none"> <li>Regional background concentration estimate for each site location, based on inverse distance weighted interpolation of regional background sites (REGIONALESTIMATE)</li> <li>Road length of major roads in a 50 meter buffer (MAJORROADLENGTH_50)</li> <li>Total traffic load of major roads in a 1000 meter buffer (sum of (traffic intensity * length of all segments)) (TRAFMAJORLOAD_1000)<sup>2</sup></li> </ul>                                                                                                                                                                                                                                                                                                                                                                                                                                                                   | $9.46 + 0.42 \times \text{REGIONALESTIMATE} + 0.01 \times \text{MAJORROADLENGTH\_50} + 2.28 \times 10^{-9} \times \text{TRAFMAJORLOAD\_1000}$                                                                                                                                                                                                                                       | 67%                     | 61%                             |
| PM10      | <ul style="list-style-type: none"> <li>Total traffic load of major roads in a 500 meter buffer (sum of (traffic intensity * length of all segments)) (TRAFMAJORLOAD_500)<sup>2</sup></li> <li>Number of inhabitants in a 5000 meter buffer (POP_5000)</li> <li>Road length of major roads in a 50 meter buffer (MAJORROADLENGTH_50)</li> </ul>                                                                                                                                                                                                                                                                                                                                                                                                                                                                                                                                                                                 | $23.71 + 2.16 \times 10^{-8} \times \text{TRAFMAJORLOAD\_500} + 6.68 \times 10^{-6} \times \text{POP\_5000} + 0.02 \times \text{MAJORROADLENGTH\_50}$                                                                                                                                                                                                                               | 68%                     | 60%                             |
| PMcoarse  | <ul style="list-style-type: none"> <li>Total traffic load of all roads in a 1000 meter buffer (sum of (traffic intensity * length of all segments)) (TRAFLOAD_1000)</li> <li>Surface area of ports in a 5000 meter buffer (PORT_5000)</li> <li>Traffic intensity on nearest road (TRAFNEAR)</li> </ul>                                                                                                                                                                                                                                                                                                                                                                                                                                                                                                                                                                                                                         | $7.59 + 5.02 \times 10^{-9} \times \text{TRAFLOAD\_1000} + 1.38 \times 10^{-7} \times \text{PORT\_5000} + 5.38 \times 10^{-5} \times \text{TRAFNEAR}$                                                                                                                                                                                                                               | 51%                     | 38%                             |
| NO2       | <ul style="list-style-type: none"> <li>Regional background concentration estimate for each site location, based on inverse distance weighted interpolation of regional background sites (REGIONALESTIMATE)</li> <li>Number of inhabitants in a 5000 meter buffer (POP_5000)</li> <li>Total traffic load of all roads in a 50 meter buffer (sum of (traffic intensity * length of all segments)) (TRAFLOAD_50)</li> <li>Road length of all roads in a 1000 meter buffer (ROADLENGTH_1000)</li> <li>Total heavy-duty traffic load of all roads in a 25 meter buffer (sum of (heavy-duty traffic intensity * length of all segments)) (HEAVYTRAFLOAD_25)</li> <li>Inverse distance to the nearest road in central road network (DISTINVNEARC1)</li> <li>Total heavy-duty traffic load of all roads in a 25 to 500 meter buffer (sum of (heavy-duty traffic intensity * length of all segments)) (HEAVYTRAFLOAD_25_500)</li> </ul> | $-7.80 + 1.18 \times 10^{-5} \times \text{REGIONALESTIMATE} + 2.3 \times 10^{-5} \times \text{POP\_5000} + 2.46 \times 10^{-6} \times \text{TRAFLOAD\_50} + 1.06 \times 10^{-4} \times \text{ROADLENGTH\_1000} + 9.84 \times 10^{-5} \times \text{HEAVYTRAFLOAD\_25} + 12.19 \times 10^{-7} \times \text{DISTINVNEARC1} + 4.47 \times 10^{-7} \times \text{HEAVYTRAFLOAD\_25\_500}$ | 86%                     | 81%                             |

<sup>†</sup> Information extracted from Eeftens et al. (2012) and Beelen et al. (2013)

<sup>1</sup> Units used: road length in meters, traffic load and intensity in veh. day<sup>-1</sup> m, number of inhabitants in numbers, surface area in m<sup>2</sup>

<sup>2</sup> Definition of major road for local road network: road with traffic intensity > 5,000 mvh/24h

**Table S2:** Southeast England area (London/Oxford) LUR model used for UK Biobank study<sup>†</sup>

| Pollutant | Predictor variables in final model <sup>1</sup>                                                                                                                                                                                                                                                                                                                           | Final LUR model                                                                                            | R <sup>2</sup> of model | R <sup>2</sup> cross validation |
|-----------|---------------------------------------------------------------------------------------------------------------------------------------------------------------------------------------------------------------------------------------------------------------------------------------------------------------------------------------------------------------------------|------------------------------------------------------------------------------------------------------------|-------------------------|---------------------------------|
| PM2.5     | <ul style="list-style-type: none"> <li>Product of inverse distance to the nearest road and nearest major road and traffic intensity on this road (INTMAJORINVDIST)<sup>2</sup></li> <li>Road length of all roads in a 500 meter buffer (ROADLENGTH_500)</li> </ul>                                                                                                        | $7.19 + 1.38 \times 10^{-3} \times$<br>INTMAJORINVDIST<br>$+ 2.65 \times 10^{-4} \times$<br>ROADLENGTH_500 | 82%                     | 77%                             |
| PM10      | <ul style="list-style-type: none"> <li>Inverse distance to the nearest road of the central road network (DISTINVMAJORC1)<sup>3</sup></li> <li>Heavy-duty traffic intensity on nearest major road (HEAVYTRAFMAJOR)</li> <li>Sum of high density and low density residential land in a 300 meter buffer (HLDRES_300)</li> </ul>                                             | 11.40 +<br>76.99*DISTINVMAJO<br>RC1 + 1.35E-<br>3*HEAVYTRAFMAJO<br>R + 1.30E-<br>5*HLDRES_300              | 90%                     | 88%                             |
| PMcoarse  | <ul style="list-style-type: none"> <li>Inverse distance and inverse squared distance to the nearest major road in local road network (DISTINVMAJOR1)<sup>2</sup></li> <li>Heavy-duty traffic intensity on nearest major road (HEAVYTRAFMAJOR)<sup>2</sup></li> </ul>                                                                                                      | 5.36 +<br>33.08*DISTINVMAJO<br>R1 + 7.98 $\times 10^{-4}$ $\times$<br>HEAVYTRAFMAJOR                       | 68%                     | 57%                             |
| NO2       | <ul style="list-style-type: none"> <li>Total traffic load of major roads in a 50 meter buffer (sum of (traffic intensity * length of all segments)) (TRAFMAJORLOAD_50)<sup>2</sup></li> <li>Road length of all roads in a 500 meter buffer (ROADLENGTH_500)</li> <li>Sum of high density and low density residential land in a 5000 meter buffer (HLDRES_5000)</li> </ul> | 8.51 + 7.30E-<br>6*TRAFMAJORLOAD<br>_50 + 1.10E-<br>3*ROADLENGTH_50<br>0 + 2.00E-<br>7*HLDRES_5000         | 89%                     | 87%                             |

<sup>†</sup> Information extracted from Eeftens et al. (2012) and Beelen et al. (2013); validation data shown in this table is not specific to the study area included in the present analysis

<sup>1</sup> Units used: road length in meters, traffic load and intensity in veh. day<sup>-1</sup> m, number of inhabitants in numbers, surface area in m<sup>2</sup>

<sup>2</sup> Definition of major road for local road network: road with traffic intensity > 5,000 mvh/24h

<sup>3</sup> Definition of major road for central road network: classes 0, 1, and 2 (+ classes 3 and 4 based on local knowledge and decision)

**Table S3:** Questionnaire assessment items used by Lifelines and UK Biobank

| Variable                                           | Study      | Questionnaire assessment items                                                                                                                                                                                                                                                                                                                         |
|----------------------------------------------------|------------|--------------------------------------------------------------------------------------------------------------------------------------------------------------------------------------------------------------------------------------------------------------------------------------------------------------------------------------------------------|
| <b>Outcome variables</b>                           |            |                                                                                                                                                                                                                                                                                                                                                        |
| Wheezing                                           | LifeLines  | <i>Have you had wheezing or whistling in your chest at any time?</i> (Yes, No) <sup>1</sup>                                                                                                                                                                                                                                                            |
|                                                    | UK Biobank | <i>Wheeze or whistling in the chest in last year?</i> (Yes, No, Don't know, Prefer not to answer)                                                                                                                                                                                                                                                      |
| Shortness of breath                                | LifeLines  | <i>Have you had an attack of shortness of breath that came on during the day when you were at rest?</i> (Yes, No) <sup>1</sup>                                                                                                                                                                                                                         |
|                                                    | UK Biobank | <i>Shortness of breath walking on level ground?</i> (Yes, No, Don't know, Prefer not to answer) <sup>1,2</sup>                                                                                                                                                                                                                                         |
| <b>Confounding factors and potential modifiers</b> |            |                                                                                                                                                                                                                                                                                                                                                        |
| Sex                                                | LifeLines  | <i>What is your gender?</i> (Man, Woman)                                                                                                                                                                                                                                                                                                               |
|                                                    | UK Biobank | <i>Sex</i> (Female, Male)                                                                                                                                                                                                                                                                                                                              |
| Age                                                | LifeLines  | <i>What is your date of birth?</i> (Day: ___ Month: ___ Year: ___)                                                                                                                                                                                                                                                                                     |
|                                                    | UK Biobank | <i>Age when attended assessment centre:</i> ___                                                                                                                                                                                                                                                                                                        |
| Body mass index                                    | LifeLines  | <i>Measured height in cm:</i> ___<br><i>Measured weight in kg:</i> ___                                                                                                                                                                                                                                                                                 |
|                                                    | UK Biobank | <i>Measured height in cm:</i> ___<br><i>Measured weight in kg:</i> ___                                                                                                                                                                                                                                                                                 |
| Education level                                    | LifeLines  | <i>What is your highest level of education?</i> (Primary education not completed, Primary education, Basic vocational training, Secondary education, Senior secondary vocational education, General senior secondary education, Higher professional education (with applied emphasis), Academic higher education (university))                         |
|                                                    | UK Biobank | <i>Which of the following qualifications do you have?</i> (College or university degree, A levels/AS levels or equivalent, O levels/GCSEs or equivalent, CSEs or equivalent, NVQ or HND or HNC or equivalent, Other professional qualifications eg: nursing, teaching, None of the above, Prefer not to answer)                                        |
| Income                                             | LifeLines  | <i>How much is your net income (take home pay) per month? If you share the costs with someone, then add the net income of your partner(s) to your income.</i> (less than € 750, € 750 – € 1000, € 1000 – € 1500, € 1500 – € 2000, € 2000 – € 2500, € 2500 – € 3000, € 3000 – € 3500, more than € 3500, I do not know, I would rather not fill this in) |
|                                                    | UK Biobank | <i>What is the average total income before tax received by your HOUSEHOLD?</i> (Less than £18,000, £18,000 to £30,999, £31,000 to £51,999, £52,000 to £100,000, Greater than £100,000, Do not know, Prefer not to answer)                                                                                                                              |
| Smoking status                                     | LifeLines  | <i>Do you now smoke, as of one month ago?</i> (Yes, No)<br><i>Have you ever smoked for as long as a year?</i> (Yes, No)                                                                                                                                                                                                                                |
|                                                    | UK Biobank | <i>Smoking status</i> (Never, Previous, Current, Prefer not to answer)                                                                                                                                                                                                                                                                                 |
| Passive smoking exposure                           | LifeLines  | <i>Not counting yourself, how many people in your household smoke regularly?</i> (___number)<br><br><i>Do people smoke regularly in the room where you work?</i> (Yes, No, Not applicable, I do not have a job)                                                                                                                                        |
|                                                    | UK Biobank | <i>At home, about how many hours per WEEK are you exposed to other people's tobacco smoke?</i> (enter number ____, Do not know, Prefer not to answer)<br><br><i>Outside of your home, about how many hours per WEEK are you exposed to other people's tobacco smoke?</i> (enter number ____, Do not know, Prefer not to answer)                        |

|               |            |                                                                                                                                                                                                                                                                  |
|---------------|------------|------------------------------------------------------------------------------------------------------------------------------------------------------------------------------------------------------------------------------------------------------------------|
| Asthma status | LifeLines  | <i>Have you ever had asthma? (Yes, No)</i><br>If yes, was this confirmed by a doctor (Yes, No)                                                                                                                                                                   |
|               | UK Biobank | <i>Has a doctor ever told you that you have had any of the following conditions? (Blood clot in the leg (DVT), Blood clot in the lung, Emphysema/chronic bronchitis, Asthma, Hayfever, allergic rhinitis or eczema, None of the above, Prefer not to answer)</i> |

---

<sup>1</sup> No time period specified

<sup>2</sup> Only 35% of UK Biobank subjects had data for shortness of breath since it was added to the baseline survey late in recruitment phase (i.e. as of 2009)

**Table S4:** Harmonized variables used in analyses

| Variable                                           | Definition                                                                                                       | Categories                                                                                                                 |
|----------------------------------------------------|------------------------------------------------------------------------------------------------------------------|----------------------------------------------------------------------------------------------------------------------------|
| <b>Outcome variables</b>                           |                                                                                                                  |                                                                                                                            |
| Wheeze                                             | Self-reported wheeze or whistling in the chest in the past year or more                                          | 0: Has not had wheeze symptoms<br>1: Has had wheeze symptoms                                                               |
| Shortness of breath                                | Self-reported shortness of breath at rest or walking on level ground                                             | 0: Has not had shortness of breath symptoms<br>1: Has had shortness of breath symptoms                                     |
| <b>Confounding factors and potential modifiers</b> |                                                                                                                  |                                                                                                                            |
| Sex                                                | Sex of the participants                                                                                          | 0: Males<br>1: Female                                                                                                      |
| Age                                                | Age of the participant                                                                                           |                                                                                                                            |
| Body mass index                                    | Body mass index of the participant derived using measured height and weight                                      | 0: Normal (<25 kg/m <sup>2</sup> )<br>1: Overweight (25 to 29.9 kg/m <sup>2</sup> )<br>2: Obese (≥30 kg/m <sup>2</sup> )   |
| Education level                                    | Highest level of education attained derived using the International Standard Classification of Education (ISCED) | 0: Secondary education or lower (ISCED levels 0-3)<br>1: Post-secondary education (ISCED levels 4-8)                       |
| Household income                                   | Above or below mean country-specific net disposable household income for 2010 <sup>1</sup>                       | 0: Mean or below mean country-specific net disposable income<br>1: Higher than mean country-specific net disposable income |
| Smoking status                                     | Participant's current and past smoking status                                                                    | 0: Never smoker<br>1: Past smoker<br>2: Current smoker                                                                     |
| Passive smoking exposure                           | Participant's passive smoking exposure at home or at work                                                        | 0: Not exposed to second-hand smoke at home or at work<br>1: Exposed to second-hand smoke at home or at work               |
| Asthma status                                      | Self-reported ever-had asthma                                                                                    | 0: Has never had asthma<br>1: Has had asthma                                                                               |

<sup>1</sup> 2010 mean net disposable income was 25 600 € in the Netherlands (Lifelines) and 20 585 £ in the United Kingdom (UK Biobank) from Organization for Co-operation and Development (OECD) data (OECD, 2016).

**Table S5:** Prevalence of wheeze and shortness of breath according to smoking status and passive smoking exposure †

|                                 | Pooled             |                                | Lifelines         |                                | UK Biobank         |                                |
|---------------------------------|--------------------|--------------------------------|-------------------|--------------------------------|--------------------|--------------------------------|
|                                 | Wheeze prevalence  | Shortness of breath prevalence | Wheeze prevalence | Shortness of breath prevalence | Wheeze prevalence  | Shortness of breath prevalence |
| <b>Smoking status</b>           |                    |                                |                   |                                |                    |                                |
| Never smoker                    | 35350<br>(16.43 %) | 8455<br>(8.85 %)               | 3944<br>(16.49 %) | 2159<br>(9.03 %)               | 31406<br>(16.42 %) | 6296<br>(8.79 %)               |
| Former smoker                   | 29455<br>(20.93 %) | 6864<br>(11.07 %)              | 3147<br>(19.91 %) | 1606<br>(10.16 %)              | 26308<br>(21.06 %) | 5258<br>(11.39 %)              |
| Current smoker                  | 5975<br>(27.08 %)  | 1844<br>(11.52 %)              | 3505<br>(28.4 %)  | 1440<br>(11.66 %)              | 2470<br>(25.41 %)  | 404<br>(11.01 %)               |
| <b>Passive smoking exposure</b> |                    |                                |                   |                                |                    |                                |
| Not exposed                     | 50219<br>(17.22 %) | 11698<br>(8.8 %)               | 7155<br>(18.7 %)  | 3574<br>(9.34 %)               | 43064<br>(16.99 %) | 8124<br>(8.58 %)               |
| Exposed                         | 20561<br>(23.84 %) | 5465<br>(13.45 %)              | 3441<br>(24.95 %) | 1631<br>(11.82 %)              | 17120<br>(23.63 %) | 3834<br>(14.29 %)              |

† For participants with complete data for PM metrics and age, sex, BMI, income, education, smoking status, passive smoking exposure.

**Table S6:** Logistic regression model estimates of associations between annual average air pollution exposures at the baseline residence and respiratory symptoms for pooled models 1, 2 and 3 \*

| Exposure and outcome                               | Pooled Model 1 <sup>1</sup> |                                      | Pooled Model 2 <sup>2</sup> |                                      | Pooled Model 3 <sup>3</sup> |                                      |
|----------------------------------------------------|-----------------------------|--------------------------------------|-----------------------------|--------------------------------------|-----------------------------|--------------------------------------|
|                                                    | No. cases / non-cases       | OR [95% CI]                          | No. cases / non-cases       | OR [95% CI]                          | No. cases / non-cases       | OR [95% CI]                          |
| <b>Wheeze</b>                                      |                             |                                      |                             |                                      |                             |                                      |
| PM <sub>2.5</sub><br>(per 5 µg/m <sup>3</sup> )    | 109012 / 410003             | <b>1.41</b><br>[ <b>1.35, 1.47</b> ] | 90105 / 344908              | <b>1.23</b><br>[ <b>1.18, 1.28</b> ] | 70780 / 307174              | <b>1.16</b><br>[ <b>1.11, 1.21</b> ] |
| PM <sub>10</sub><br>(per 5 µg/m <sup>3</sup> )     | 109012 / 410003             | <b>1.09</b><br>[ <b>1.07, 1.12</b> ] | 90105 / 344908              | <b>1.05</b><br>[ <b>1.03, 1.07</b> ] | 70780 / 307174              | <b>1.03</b><br>[ <b>1.01, 1.05</b> ] |
| PM <sub>coarse</sub><br>(per 5 µg/m <sup>3</sup> ) | 109012 / 410003             | <b>1.11</b><br>[ <b>1.05, 1.16</b> ] | 90105 / 344908              | <b>1.07</b><br>[ <b>1.02, 1.12</b> ] | 70780 / 307174              | 1.05<br>[1.00, 1.10]                 |
| NO <sub>2</sub><br>(per 10 µg/m <sup>3</sup> )     | 115724 / 436593             | <b>1.07</b><br>[ <b>1.06, 1.08</b> ] | 95886 / 368161              | <b>1.05</b><br>[ <b>1.03, 1.06</b> ] | 74959 / 327742              | <b>1.03</b><br>[ <b>1.02, 1.04</b> ] |
| <b>Shortness of breath</b>                         |                             |                                      |                             |                                      |                             |                                      |
| PM <sub>2.5</sub><br>(per 5 µg/m <sup>3</sup> )    | 26130 / 208841              | <b>2.10</b><br>[ <b>1.91, 2.32</b> ] | 20796 / 176549              | <b>1.69</b><br>[ <b>1.53, 1.88</b> ] | 17163 / 156397              | <b>1.61</b><br>[ <b>1.45, 1.78</b> ] |
| PM <sub>10</sub><br>(per 5 µg/m <sup>3</sup> )     | 26130 / 208841              | <b>1.28</b><br>[ <b>1.22, 1.35</b> ] | 20796 / 176549              | <b>1.22</b><br>[ <b>1.16, 1.29</b> ] | 17163 / 156397              | <b>1.20</b><br>[ <b>1.14, 1.27</b> ] |
| PM <sub>coarse</sub><br>(per 5 µg/m <sup>3</sup> ) | 26130 / 208841              | <b>1.34</b><br>[ <b>1.21, 1.48</b> ] | 20796 / 176549              | <b>1.30</b><br>[ <b>1.17, 1.44</b> ] | 17163 / 156397              | <b>1.28</b><br>[ <b>1.15, 1.42</b> ] |
| NO <sub>2</sub><br>(per 10 µg/m <sup>3</sup> )     | 26139 / 208900              | <b>1.19</b><br>[ <b>1.16, 1.22</b> ] | 20804 / 176601              | <b>1.17</b><br>[ <b>1.14, 1.20</b> ] | 17171 / 156443              | <b>1.16</b><br>[ <b>1.13, 1.19</b> ] |

<sup>1</sup> Adjusted for age (continuous), sex, and cohort (Lifelines or UK Biobank)

<sup>2</sup> Adjusted for age (continuous), sex, BMI (normal, overweight, or obese), household income (annual net income ≤ or > the country-specific mean for 2010), education level (≤ secondary or post-secondary), and cohort (Lifelines or UK Biobank)

<sup>3</sup> Adjusted for age (continuous), sex, BMI (normal, overweight, or obese), household income (annual net income ≤ or > the country-specific mean for 2010), education level (≤ secondary or post-secondary), smoking status (never, former, or current), passive smoking exposure (none or any), and cohort (Lifelines or UK Biobank)

\* Statistically significant results (p<0.05) are given in bold



**Table S7:** Sensitivity analyses: restricting pooled analyses to those living at the same address for more than 5 years and more than 10 years<sup>†, \*</sup>

| Exposure and outcome                               | 5 years at baseline residence |                                    | 10 years at baseline residence |                                    |
|----------------------------------------------------|-------------------------------|------------------------------------|--------------------------------|------------------------------------|
|                                                    | No. cases / non-cases         | OR [95% CI]                        | No. cases / non-cases          | OR [95% CI]                        |
| <b>Wheeze</b>                                      |                               |                                    |                                |                                    |
| PM <sub>2.5</sub><br>(per 5 µg/m <sup>3</sup> )    | 58083 / 256002                | <b>1.16</b><br><b>[1.11, 1.22]</b> | 44963 / 200715                 | <b>1.17</b><br><b>[1.11, 1.24]</b> |
| PM <sub>10</sub><br>(per 5 µg/m <sup>3</sup> )     | 58083 / 256002                | <b>1.03</b><br><b>[1.00, 1.05]</b> | 44963 / 200715                 | <b>1.03</b><br><b>[1.01, 1.07]</b> |
| PM <sub>coarse</sub><br>(per 5 µg/m <sup>3</sup> ) | 58083 / 256002                | 1.04<br>[0.99, 1.10]               | 44963 / 200715                 | <b>1.06</b><br><b>[1.00, 1.13]</b> |
| NO <sub>2</sub><br>(per 10 µg/m <sup>3</sup> )     | 61555 / 273579                | <b>1.03</b><br><b>[1.01, 1.04]</b> | 47737 / 215122                 | <b>1.03</b><br><b>[1.01, 1.04]</b> |
| <b>Shortness of breath</b>                         |                               |                                    |                                |                                    |
| PM <sub>2.5</sub><br>(per 5 µg/m <sup>3</sup> )    | 13548 / 127882                | <b>1.65</b><br><b>[1.47, 1.85]</b> | 10212 / 98098                  | <b>1.61</b><br><b>[1.41, 1.83]</b> |
| PM <sub>10</sub><br>(per 5 µg/m <sup>3</sup> )     | 13548 / 127882                | <b>1.19</b><br><b>[1.12, 1.26]</b> | 10212 / 98098                  | <b>1.20</b><br><b>[1.12, 1.28]</b> |
| PM <sub>coarse</sub><br>(per 5 µg/m <sup>3</sup> ) | 13548 / 127882                | <b>1.22</b><br><b>[1.08, 1.37]</b> | 10212 / 98098                  | <b>1.25</b><br><b>[1.10, 1.43]</b> |
| NO <sub>2</sub><br>(per 10 µg/m <sup>3</sup> )     | 13552 / 127919                | <b>1.17</b><br><b>[1.14, 1.20]</b> | 10216 / 98123                  | <b>1.17</b><br><b>[1.13, 1.21]</b> |

<sup>†</sup> Adjusted for age (continuous), sex, BMI (normal, overweight, or obese), household income (annual net income ≤ or > the country-specific mean for 2010), education level (≤ secondary or post-secondary), smoking status (never, former, or current), passive smoking exposure (none or any), and cohort (Lifelines or UK Biobank)

\* Statistically significant results (p<0.05) are given in bold

**Figure S1:** Adjusted odds ratios (and 95% CI) for respiratory symptoms in association with a 5-ug/m3 increase in ambient PM<sub>10</sub> at participant residences among population subgroups based on pooled data from the Lifelines and UK Biobank cohorts <sup>†, \*</sup>

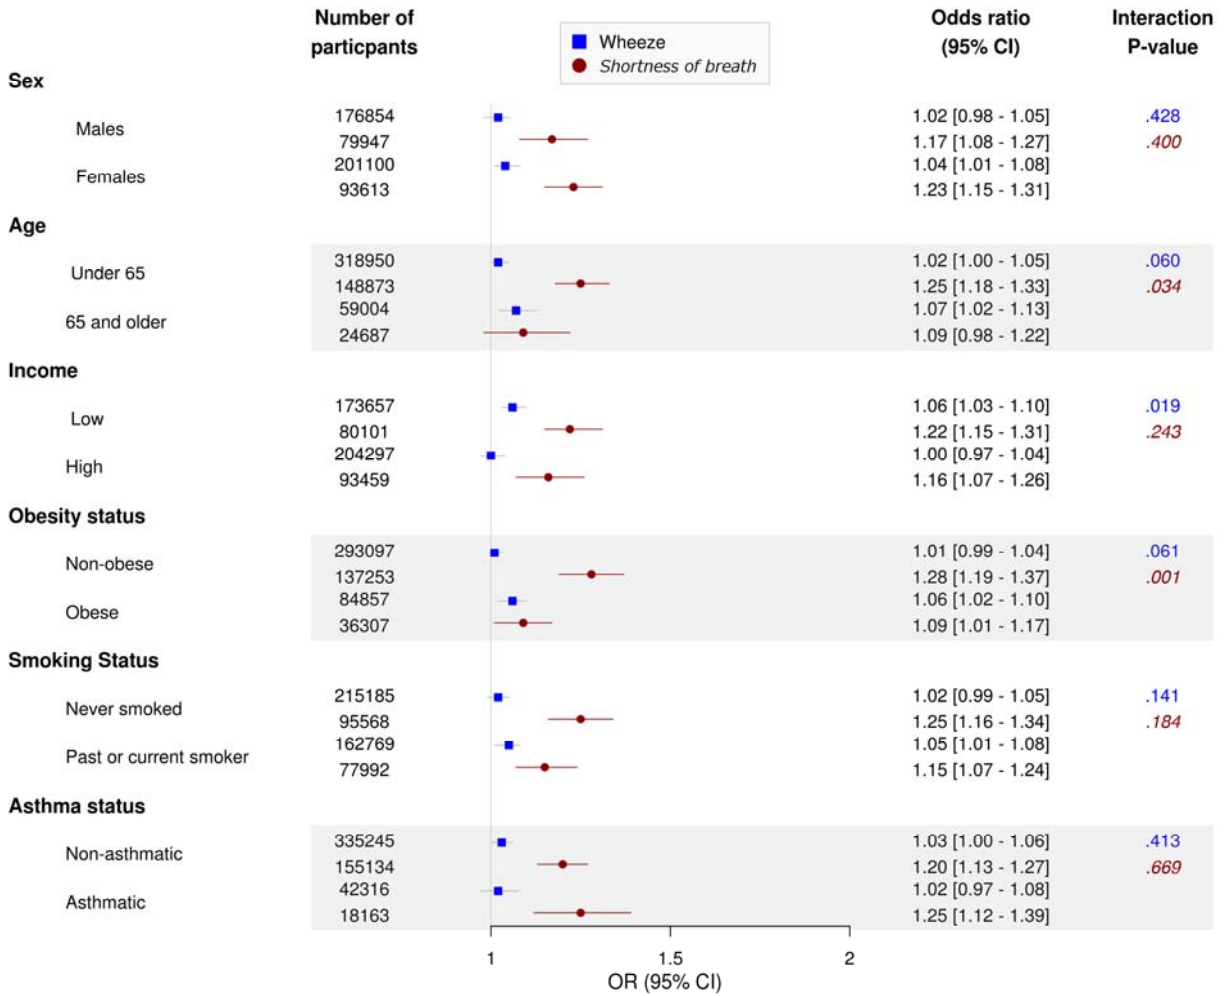

<sup>†</sup> Logistic regression model adjusted for age (continuous), sex, BMI (normal, overweight, or obese), household income (annual net income ≤ or > the country-specific mean for 2010), education level (≤ secondary or post-secondary), smoking status (never, former, or current), passive smoking exposure (none or any), and cohort (Lifelines or UK Biobank)

\*Interaction p-values are Wald p-values for product interaction terms between air pollutants and stratification variables, blue font for wheeze symptoms and red *italics* font for shortness of breath symptoms

**Figure S2:** Adjusted odds ratios (and 95% CI) for respiratory symptoms in association with a 10-ug/m<sup>3</sup> increase in ambient NO<sub>2</sub> at participant residences among population subgroups based on pooled data from the Lifelines and UK Biobank cohorts <sup>†,\*</sup>

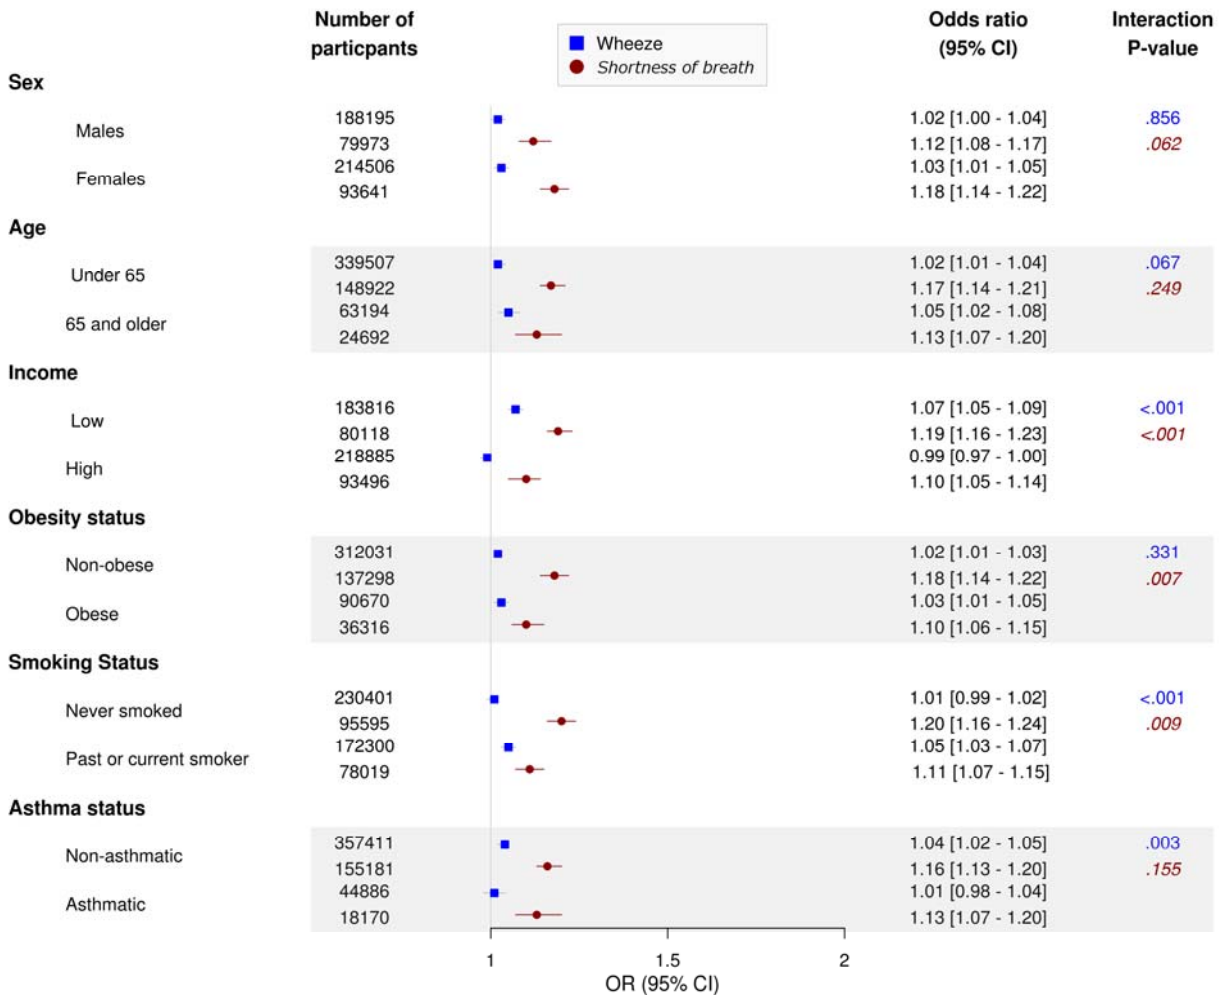

<sup>†</sup> Logistic regression model adjusted for age (continuous), sex, BMI (normal, overweight, or obese), household income (annual net income ≤ or > the country-specific mean for 2010), education level (≤ secondary or post-secondary), smoking status (never, former, or current), passive smoking exposure (none or any), and cohort (Lifelines or UK Biobank)

\*Interaction p-values are Wald p-values for product interaction terms between air pollutants and stratification variables, blue font for wheeze symptoms and red *italics* font for shortness of breath symptoms
